# Supplementary material
Source: PubMed Central journal article supplement (PMC4143404)
Supplement: epi-9-1018-s01.pdf [file epi-9-1018-s01.pdf]

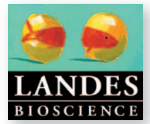

## **Supplemental Material to:**

**Joong-Gook Kim, Tae-Oh Kim, Jin-Han Bae,  
Jae-Woong Shim, Myoung Joo Kang, Kwang-Mo Yang,  
Angela H Ting, and Joo Mi Yi**

**Epigenetically regulated MIR941 and MIR1247 target  
gastric cancer cell growth and migration**

**Epigenetics 2014; 9(7)**

**<http://dx.doi.org/10.4161/epi.29007>**

**[http://www.landesbioscience.com/journals/epigenetics/  
article/29007/](http://www.landesbioscience.com/journals/epigenetics/article/29007/)**

**Supplementary Table S1.** Predicted signaling pathway of miRNAs target genes by KEGG databases

| Representative miRNA | Target gene    | Accession No.                               | KEGG pathway classification                                                                                                                                                                                                                                                     |
|----------------------|----------------|---------------------------------------------|---------------------------------------------------------------------------------------------------------------------------------------------------------------------------------------------------------------------------------------------------------------------------------|
| <b>MIR941</b>        | <i>PRDM16</i>  | NM_022114,<br>NM_199454                     | --                                                                                                                                                                                                                                                                              |
|                      | <i>KMT2D</i>   | NM_003482                                   | Lysine degradation                                                                                                                                                                                                                                                              |
|                      | <i>TAOK1</i>   | NM_020791,<br>NM_025142                     | M Phase, Resolution of Sister Chromatid Cohesion, MAPK signaling pathway, Cell Cycle, p38 MAPK signaling pathway                                                                                                                                                                |
|                      | <i>IER5L</i>   | NM_203434                                   | --                                                                                                                                                                                                                                                                              |
|                      | <i>GRIN2D</i>  | NM_000836                                   | CREB phosphorylation through the activation of CaMKII, Post NMDA receptor activation events, Transmission across Chemical Synapses, Neurophysiological process Glutamate regulation of Dopamine D1A receptor signaling, Signal transduction Erk Interactions: Inhibition of Erk |
|                      | <i>KDM6B</i>   | NM_001080424                                | Chromatin Regulation / Acetylation                                                                                                                                                                                                                                              |
|                      | <i>NFIX</i>    | NM_002501                                   | Oxidative Stress                                                                                                                                                                                                                                                                |
|                      | <i>RASL10B</i> | NM_033315                                   | --                                                                                                                                                                                                                                                                              |
|                      | <i>NTN1</i>    | NM_004822                                   | Activation of cAMP-Dependent PKA, Role of second messengers in netrin-1 signaling, Axon guidance, Netrin-1 signaling, Netrin mediated repulsion signals                                                                                                                         |
|                      | <i>TNRC6B</i>  | NM_001024843,<br>NM_001162501,<br>NM_015088 | Signaling by FGFR, PIP3 activates AKT signaling, Immune System, p53 positively regulates transcription of MIR34 microRNAs, Signaling by the B Cell Receptor (BCR)                                                                                                               |
| <b>MIR1247</b>       | <i>MYCBP2</i>  | NM_015057                                   | Integrated Breast Cancer Pathway                                                                                                                                                                                                                                                |
|                      | <i>RCC2</i>    | NM_001136204                                | M Phase, Resolution of Sister Chromatid Cohesion, Cell Cycle, Cytoskeletal Signaling, Cell Cycle / Checkpoint Control                                                                                                                                                           |
|                      | <i>STX1B</i>   | NM_052874                                   | Botulinum neurotoxicity, Nicotine Pathway (Dopaminergic Neuron), Pharmacodynamics, Synaptic Vesicle Pathway, Disease, Transmission across Chemical Synapses                                                                                                                     |
|                      | <i>PHF21A</i>  | NM_001101802                                | Factors involved in megakaryocyte development and platelet production, Platelet activation, signaling and aggregation                                                                                                                                                           |
|                      | <i>BRSK1</i>   | NM_032430                                   | Neuroscience, Cell Cycle / Checkpoint Control, LKB1 signaling events, Glucose / Energy Metabolism                                                                                                                                                                               |
|                      | <i>RARA</i>    | NM_000964                                   | Transcription_Sin3 and NuRD in transcription regulation, Nuclear Receptor transcription pathway, Generic Transcription Pathway, Integrated Pancreatic Cancer Pathway, Development_Ligand-dependent activation of the ESR1/AP-1 pathway                                          |
|                      | <i>ZBTB46</i>  | NM_025224                                   | --                                                                                                                                                                                                                                                                              |
|                      | <i>RBM19</i>   | NM_001146699                                | --                                                                                                                                                                                                                                                                              |
|                      | <i>MOCS1</i>   | NM_001075098                                | Metabolism, Molybdenum cofactor biosynthesis, Vitamin B5 (pantothenate) metabolism, Folate biosynthesis                                                                                                                                                                         |
|                      | <i>BLCAP</i>   | NM_001167820                                | --                                                                                                                                                                                                                                                                              |
|                      | <i>IGSF9B</i>  | NM_014987                                   | --                                                                                                                                                                                                                                                                              |
|                      | <i>CPEB4</i>   | NM_030627                                   | --                                                                                                                                                                                                                                                                              |
| <i>CREBZF</i>        | NM_001039618   | --                                          |                                                                                                                                                                                                                                                                                 |
